# Supplementary material for: Spine Surgery and Major Blood Loss: How Accurate is Suction Canister Estimation?
Source: Research Square preprint supplement (doi:10.21203/rs.3.rs-6549001/v1), 2025-05-19
Supplement: Supplementary file 1 [file fa0b13957ee71990e6170620.docx]

Supplementary material to

**Spine Surgery and Major Blood Loss: How Accurate is Suction Canister Estimation?**

Kafka et al.

Supplementary Table 1: Percentage of Blood Loss to Surgical Gauze Out of Total Blood Loss

|  | **%** | **Median (IQR)** |
| --- | --- | --- |
| **Total** | 21.189 ± 8.498 | 21.780 (12.215) |
| **Subgroup** | **%** | **P-value** |
| **Sex** |  |  |
| Males (n = 14) | 19.34 ± 7.49 | 0.2559 |
| Females (n = 14) | 23.04 ± 9.30 |  |
| **Age** |  |  |
| < 65 (n = 10) | 20.49 ± 8.87 | 0.7525 |
| ≥ 65 (n = 18) | 21.58 ± 8.52 |  |
| **BMI**  **(kg /m2)** |  |  |
| < 25 (n = 8) | 22.41 ± 10.15 | 0.6406 |
| ≥ 25 (n = 20) | 20.70 ± 7.99 |  |
| **ASA classification** |  |  |
| < 3 (n = 13) | 20.99 ± 7.86 | 0.9089 |
| ≥ 3 (n = 15) | 21.37 ± 9.29 |  |
| **Surgery type** |  |  |
| Posterior column surgery (n = 22) | 22.48 ± 7.65 | 0.1273 |
| Two columns surgery (n = 6) | 16.47 ± 10.50 |  |
| **Surgical time (min)** |  |  |
| < 180 (n = 8) | 23.71 ± 9.01 | 0.3296 |
| ≥ 180 (n = 20) | 20.18 ± 8.31 |  |

Supplementary Table 2: Percentage of Blood Loss to Surgical Gauze from Blood Loss in the Suction

|  | **%** | **Median (IQR)** |
| --- | --- | --- |
| **Total** | 28.327 ± 13.932 | 27.840 (19.580) |
| **Subgroup** | **%** | **P-value** |
| **Sex** |  |  |
| Males (n = 14) | 24.94 ± 11.29 | 0.0843 |
| Females (n = 14) | 31.71 ± 15.84 |  |
| **Age** |  |  |
| < 65 (n = 10) | 27.21 ± 14.40 | 0.7293 |
| ≥ 65 (n = 18) | 28.95 ± 14.05 |  |
| **BMI**  **(kg /m2)** |  |  |
| < 25 (n = 8) | 30.81 ± 16.95 | 0.9999 |
| ≥ 25 (n = 20) | 27.34 ± 12.90 |  |
| **ASA classification** |  |  |
| < 3 (n = 13) | 27.81 ± 13.59 | 0.7007 |
| ≥ 3 (n = 15) | 28.78 ± 14.68 |  |
| **Surgery type** |  |  |
| Posterior column surgery (n = 22) | 30.22 ± 13.08 | 0.1730 |
| Two columns surgery (n = 6) | 21.39 ± 16.01 |  |
| **Surgical time (min)** |  |  |
| < 180 (n = 8) | 32.67 ± 15.47 | 0.5754 |
| ≥ 180 (n = 20) | 26.59 ± 13.29 |  |
